# Supplementary material
Source: publisher site journal article supplement (https://www.dovepress.com/get_supplementary_file.php?f=232926.docx)
Supplement: Supplementary file 1 [file get_supplementary_file.php]

**Size-dependent cytotoxicity of hydroxyapatite crystals on renal epithelial cells**

Xin-Yuan Sun, Jia-Yun Chen, Chen-Ying Rao, Jian-Ming Ouyang*

Institute of Biomineralization and Lithiasis Research, Jinan University, Guangzhou 510632, China

Fig. S1. XRD patterns (A) and FT-IR spectra (B) of HAPs with different sizes. (a) HAP-40 nm; (b) HAP-70 nm; (c) HAP-1 µm; (d) HAP-2 µm; (e) HAP standard spectra (JCPDS No. 09-0432).

Fig. S2. Zeta potential (A) and conductivity (B) of HAPs with different sizes in DMEM/F-12 medium and pure water.

Fig. S3. N2 adsorption and desorption curves and pore size distribution curves (illustration) of HAP with different sizes. (A) HAP-40 nm; (B) HAP-70 nm; (C) HAP-1 μm; (D) HAP-2 μm.
